# Supplementary material for: Diverse organic carbon dynamics captured by radiocarbon analysis of distinct compound classes in a grassland soil
Source: Copernicus journal article supplement (doi:10.5194/bg-21-4395-2024), 2024-10-10
Supplement: Supplementary file 1 [file bg-21-4395-2024-supplement.zip]

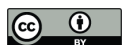

## *Supplement of*

# **Diverse organic carbon dynamics captured by radiocarbon analysis of distinct compound classes in a grassland soil**

**Katherine E. Grant et al.**

*Correspondence to:* Katherine E. Grant ([grant39@llnl.gov](mailto:grant39@llnl.gov))

- [bg-21-4395-2024-supplement-title-page.pdf](#)
- [KEG\\_Biogeosciences\\_MS\\_SI\\_v5.pdf](#)
- [KEG\\_HREC\\_CC\\_14C\\_SI\\_tables\\_upload\\_AUG.xlsx](#)

The copyright of individual parts of the supplement might differ from the article licence.
